# Supplementary material for: Amino acids as bio-organocatalysts in ring-opening copolymerization for eco-friendly synthesis of biobased oligomers from vegetable oils
Source: Royal Society of Chemistry journal article supplement (doi:10.1039/d4ob00339j), 2024-01-01
Supplement: d4ob00339j1.pdf [file d4ob00339j1.pdf]

## Supporting Information

# Amino Acids as Bio-Organocatalysts in Ring-Opening Copolymerization for Eco-Friendly Synthesis of Biobased Oligomers from Vegetable Oils

Francisca Werlinger,<sup>a,b</sup> Monserrat Beroíza-Duhart,<sup>b</sup> Oscar A. Douglas-Gallardo,<sup>b</sup> Silvia Oyarzo-Aro,<sup>b</sup> Maria Luisa Valenzuela,<sup>c</sup> Oleksandra S. Trofymchuk,<sup>a\*</sup> Mario E. Flores,<sup>b\*</sup> and Javier Martínez,<sup>b\*</sup>

<sup>a</sup>Facultad de Ciencias Químicas y Farmacéuticas, Departamento de Química Orgánica y Físicoquímica, Universidad de Chile, Santiago 8380492, Chile.

<sup>b</sup>Instituto de Ciencias Químicas, Facultad de Ciencias, Isla Teja, Universidad Austral de Chile, Valdivia 5090000, Chile.

<sup>c</sup>Universidad Autónoma de Chile, Facultad de Ingeniería, Instituto de Ciencias Químicas Aplicadas, Grupo de Investigación en Energía y Procesos Sustentables, Av. El Llano Subercaseaux, Santiago, 2801, Chile

|                                                                                                                                                                        |     |
|------------------------------------------------------------------------------------------------------------------------------------------------------------------------|-----|
| <b>Figure S1.</b> Chemical structure of fatty acids found in cooking olive oil.                                                                                        | S1  |
| <b>Table S1.</b> Fatty acid composition of used cooking olive oil. <sup>[a]</sup>                                                                                      | S1  |
| <b>Figure S2.</b> <sup>1</sup> H-NMR spectrum of a) waste cooking olive oil, WCOO; b) Epoxidized Olive Oil, EOO in CDCl <sub>3</sub> .                                 | S2  |
| <b>Figure S3.</b> <sup>1</sup> H-NMR spectrum of EOO in CDCl <sub>3</sub> .                                                                                            | S2  |
| <b>Figure S4.</b> <sup>13</sup> C{ <sup>1</sup> H}-NMR spectrum of EOO in CDCl <sub>3</sub> .                                                                          | S3  |
| <b>Figure S5.</b> <sup>1</sup> H-NMR spectrum of poly(EOO- <i>co</i> -PA) in CDCl <sub>3</sub> .                                                                       | S3  |
| <b>Figure S6.</b> <sup>13</sup> C{ <sup>1</sup> H}-NMR spectrum of poly(EOO- <i>co</i> -PA) in CDCl <sub>3</sub> .                                                     | S4  |
| <b>Figure S7.</b> g-HSQC NMR spectrum of poly(EOO- <i>co</i> -PA) in CDCl <sub>3</sub> .                                                                               | S4  |
| <b>Figure S8.</b> FT-IR spectrum of poly(EOO- <i>co</i> -PA) in CDCl <sub>3</sub> .                                                                                    | S5  |
| <b>Figure S9.</b> GPC trace of poly(EOO- <i>co</i> -PA).                                                                                                               | S5  |
| <b>Figure S10.</b> TGA analysis of poly(EOO- <i>co</i> -PA).                                                                                                           | S5  |
| <b>Figure S11.</b> <sup>1</sup> H-NMR spectrum of mixture <i>cis/trans</i> poly(EOO- <i>co</i> -MA); Table 2, entry 1                                                  | S6  |
| <b>Figure S12.</b> <sup>1</sup> H-NMR spectrum of <i>trans</i> poly(EOO- <i>co</i> -MA) in CDCl <sub>3</sub> .                                                         | S7  |
| <b>Figure S13.</b> <sup>13</sup> C{ <sup>1</sup> H}-NMR spectrum <i>trans</i> of poly(EOO- <i>co</i> -MA) in CDCl <sub>3</sub> .                                       | S7  |
| <b>Figure S14.</b> DEPT-NMR spectrum of <i>trans</i> poly(EOO- <i>co</i> -MA) in CDCl <sub>3</sub> .                                                                   | S8  |
| <b>Figure S15.</b> g-HSQC NMR spectrum <i>trans</i> of poly(EOO- <i>co</i> -MA) in CDCl <sub>3</sub> .                                                                 | S8  |
| <b>Figure S16.</b> FT-IR spectrum of <i>trans</i> poly(EOO- <i>co</i> -MA) in CDCl <sub>3</sub> .                                                                      | S9  |
| <b>Figure S17.</b> GPC trace of <i>trans</i> poly(EOO- <i>co</i> -MA).                                                                                                 | S9  |
| <b>Figure S18.</b> TGA analysis of <i>trans</i> poly(EOO- <i>co</i> -MA).                                                                                              | S10 |
| <b>Figure S19.</b> <sup>1</sup> H-NMR spectrum of poly(EOO- <i>co</i> -SA) in CDCl <sub>3</sub> .                                                                      | S10 |
| <b>Figure S20.</b> <sup>13</sup> C{ <sup>1</sup> H}-NMR spectrum of poly(EOO- <i>co</i> -SA) in CDCl <sub>3</sub> .                                                    | S11 |
| <b>Figure S21.</b> DEPT-NMR spectrum of <i>trans</i> poly(EOO- <i>co</i> -SA) in CDCl <sub>3</sub> .                                                                   | S11 |
| <b>Figure S22.</b> g-HSQC NMR spectrum of poly(EOO- <i>co</i> -SA) in CDCl <sub>3</sub> .                                                                              | S12 |
| <b>Figure S23.</b> FT-IR spectrum of poly(EOO- <i>co</i> -SA) in CDCl <sub>3</sub> .                                                                                   | S12 |
| <b>Figure S24.</b> GPC trace of poly(EOO- <i>co</i> -SA).                                                                                                              | S13 |
| <b>Figure S25.</b> TGA analysis of poly(EOO- <i>co</i> -SA).                                                                                                           | S13 |
| <b>Figure S26.</b> <sup>1</sup> H-NMR spectrum of poly(EOO- <i>co</i> -GA) in CDCl <sub>3</sub> .                                                                      | S14 |
| <b>Figure S27.</b> <sup>13</sup> C{ <sup>1</sup> H}-NMR spectrum of poly(EOO- <i>co</i> -GA) in CDCl <sub>3</sub> .                                                    | S14 |
| <b>Figure S28.</b> DEPT-NMR spectrum of <i>trans</i> poly(EOO- <i>co</i> -GA) in CDCl <sub>3</sub> .                                                                   | S15 |
| <b>Figure S29.</b> g-HSQC NMR spectrum of poly(EOO- <i>co</i> -GA) in CDCl <sub>3</sub> .                                                                              | S15 |
| <b>Figure S30.</b> FT-IR spectrum of poly(EOO- <i>co</i> -GA) in CDCl <sub>3</sub> .                                                                                   | S16 |
| <b>Figure S31.</b> GPC trace of poly(EOO- <i>co</i> -GA).                                                                                                              | S16 |
| <b>Figure S32.</b> TGA analysis of poly(EOO- <i>co</i> -GA).                                                                                                           | S17 |
| <b>Figure S33.</b> Optimized geometries for a set of epoxide molecules with different side-chain sizes in toluene                                                      | S17 |
| <b>Figure S34.</b> Initial and final structures of L-Glu molecule optimized with different DFT xc-functionals                                                          | S18 |
| <b>Figure S35.</b> Optimized geometries for a set of molecular complexes identified when L-Glu is interacting with a single epoxide substrate molecule in vacuum       | S18 |
| <b>Table S2.</b> <i>Trans-cis</i> isomers relative energies obtained for a set of epoxides with different side-chain sizes computed at DFT and SCS-MP2 level of theory | S18 |
| <b>Table S3.</b> Hirshfeld atomic charge analysis for a set of epoxide model with different side-chain size in vacuum.                                                 | S19 |
| <b>Table S4.</b> Relative energies obtained for a set of molecular complexes identified at DFT level and recalculated at SCS-MP2 level in vacuum                       | S19 |

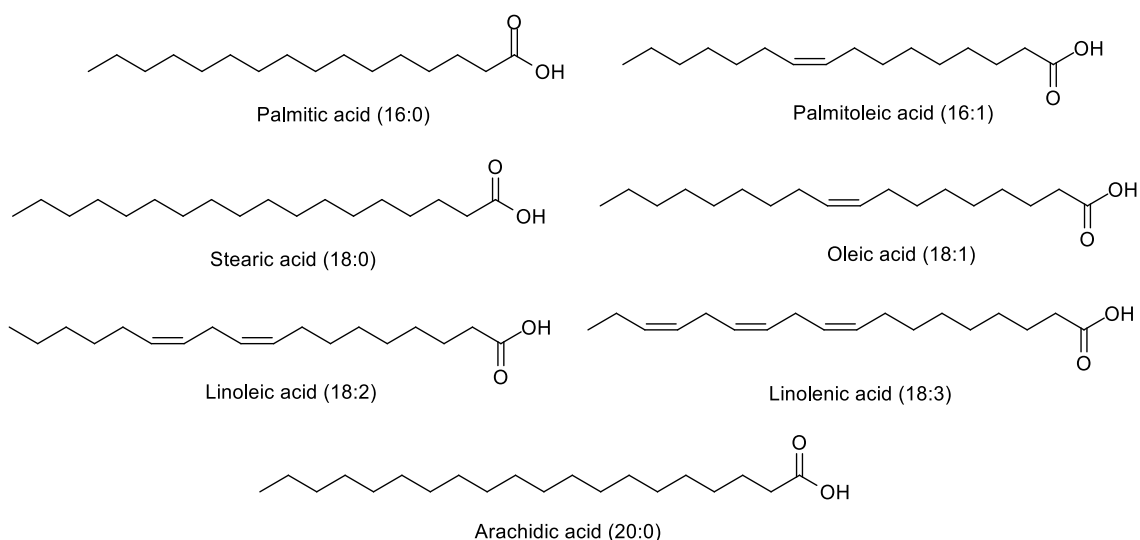

**Figure S1.** Chemical structures of fatty acids found in waste cooking olive oil, WCOO.

**Table S1.** Fatty acid composition of cooking olive oil.<sup>[a]</sup>

| (16:0) | (16:1) | (18:0) | (18:1) | (18:2) | (18:3) | (20:0) | Ox. Num.              |
|--------|--------|--------|--------|--------|--------|--------|-----------------------|
| (%)    | (%)    | (%)    | (%)    | (%)    | (%)    | (%)    | (mmol/g) <sup>a</sup> |
| 12.53  | 1.02   | 2.17   | 72.07  | 11.10  | 0.71   | 0.40   | 2.92                  |

<sup>[a]</sup>Determined by GC-FID. <sup>[b]</sup>Ox. Number: Number of double bonds per gram of triglyceride unit. Ox. Number =  $(\sum \% \text{ fatty acid} \cdot x)/100$ ; x = total number of double bonds per triglyceride unit.

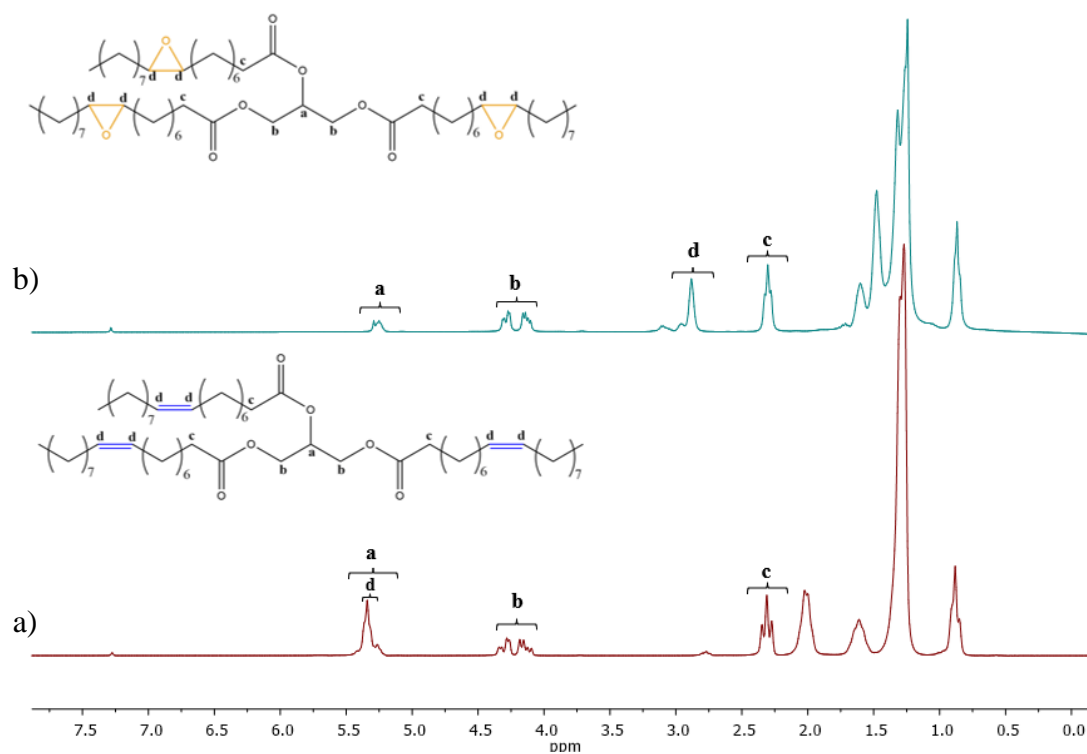

**Figure S2.** <sup>1</sup>H-NMR spectrum of a) waste cooking olive oil, WCOO; b) Epoxidized Olive Oil, EOO in CDCl<sub>3</sub>.

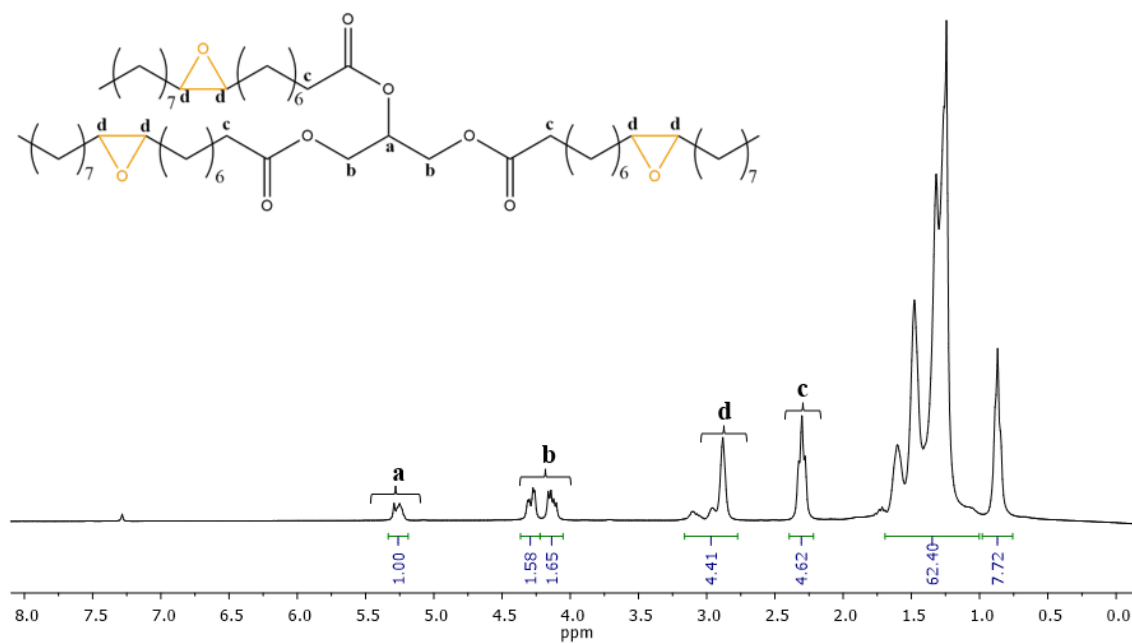

**Figure S3.** <sup>1</sup>H-NMR spectrum of EOO in CDCl<sub>3</sub>.

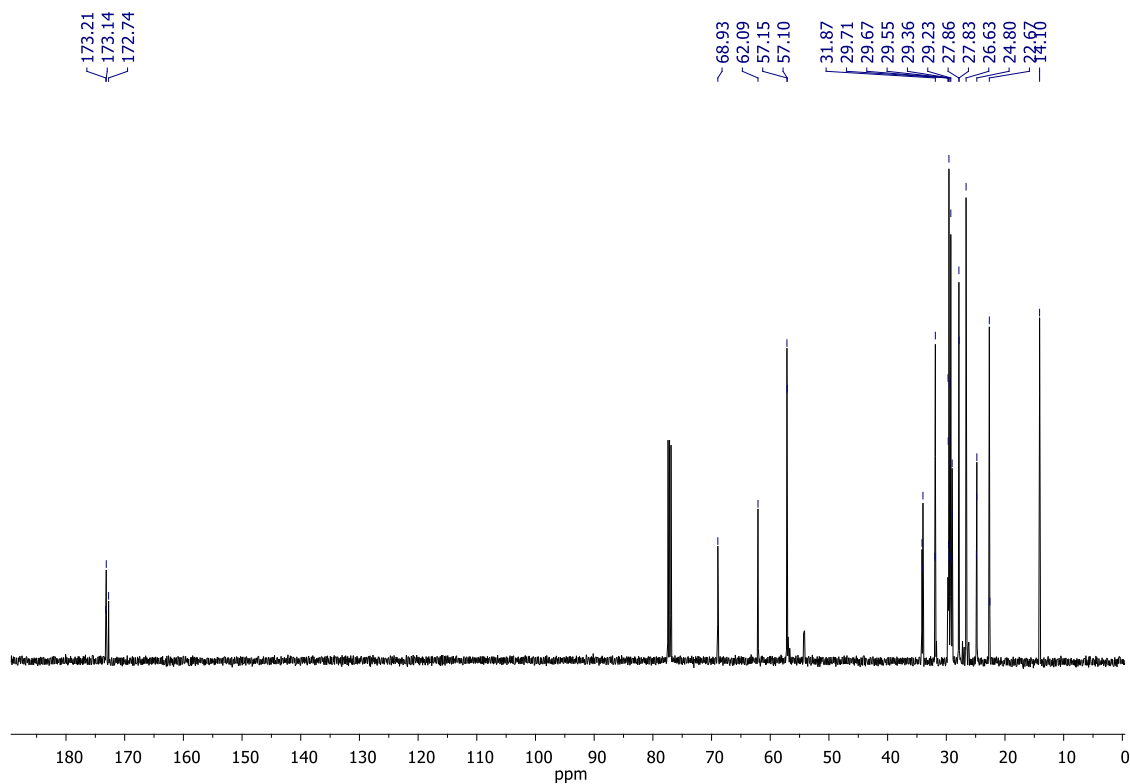

**Figure S4.**  $^{13}\text{C}\{^1\text{H}\}$ -NMR spectrum of EOO in  $\text{CDCl}_3$ .

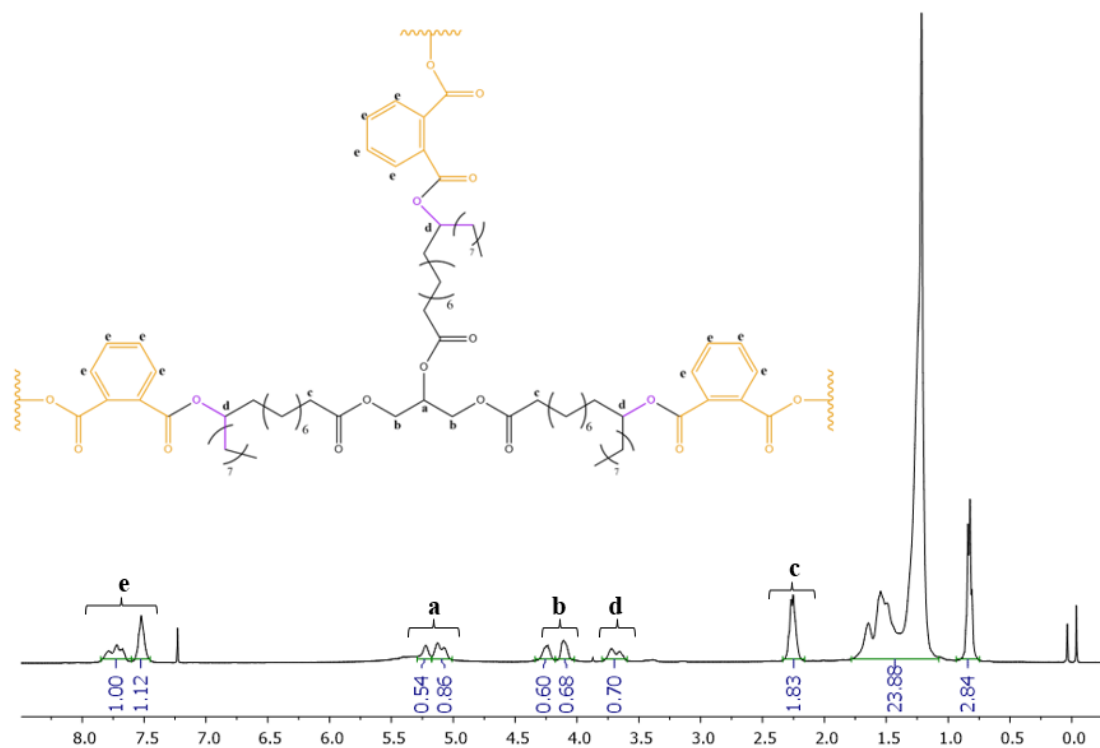

**Figure S5.**  $^1\text{H}$ -NMR spectrum of poly(EOO-co-PA) in  $\text{CDCl}_3$ .

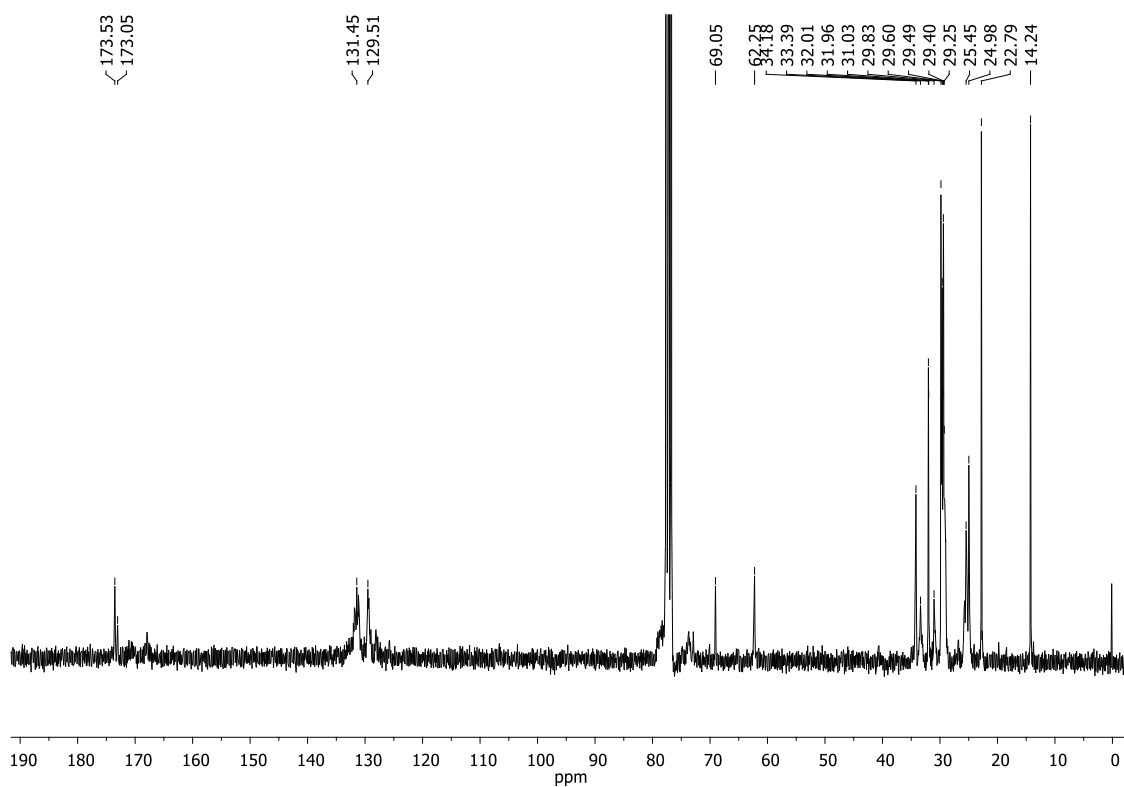

**Figure S6.**  $^{13}\text{C}\{^1\text{H}\}$ -NMR spectrum of poly(EEO-*co*-PA) in  $\text{CDCl}_3$ .

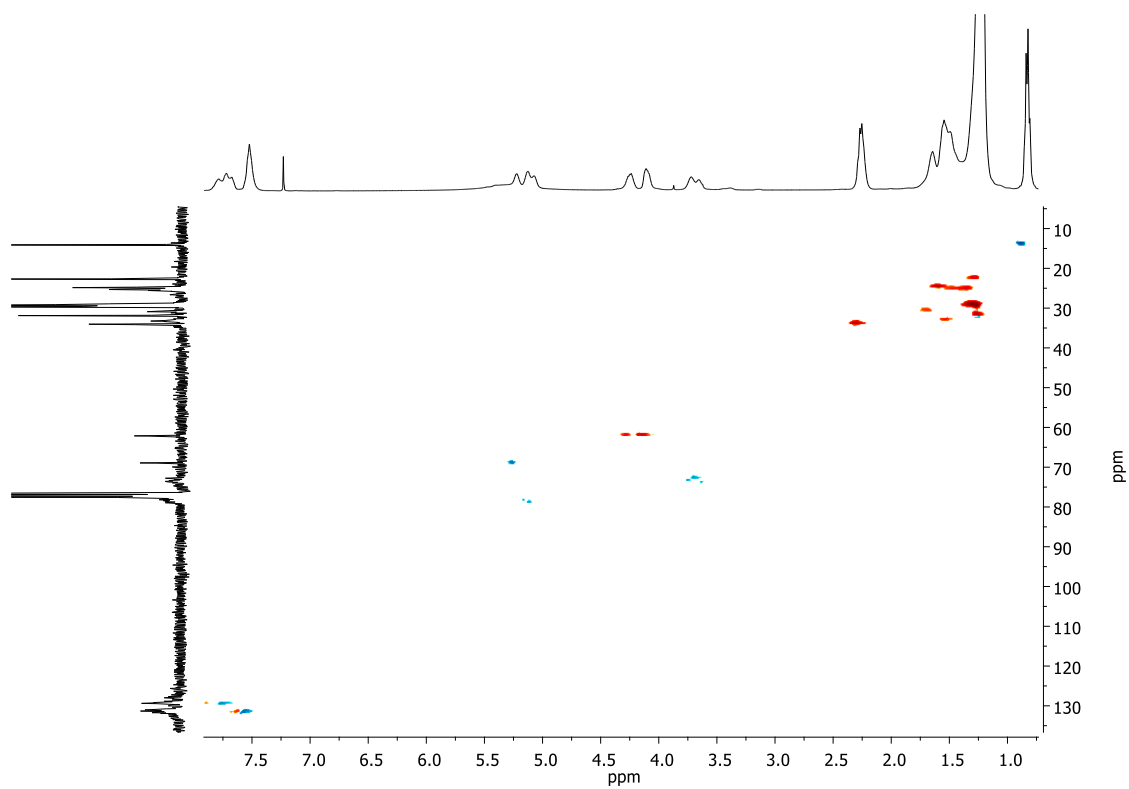

**Figure S7.** g-HSQC NMR spectrum of poly(EEO-*co*-PA) in  $\text{CDCl}_3$ .

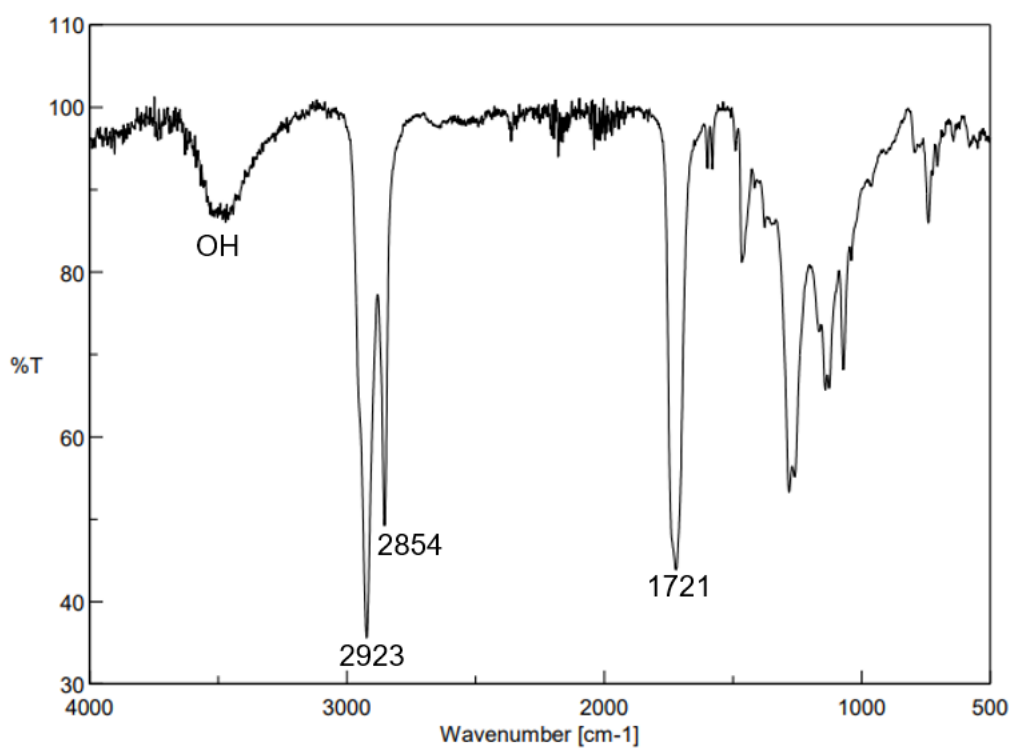

**Figure S8.** FT-IR spectrum of poly(EEO-co-PA) in CDCl<sub>3</sub>.

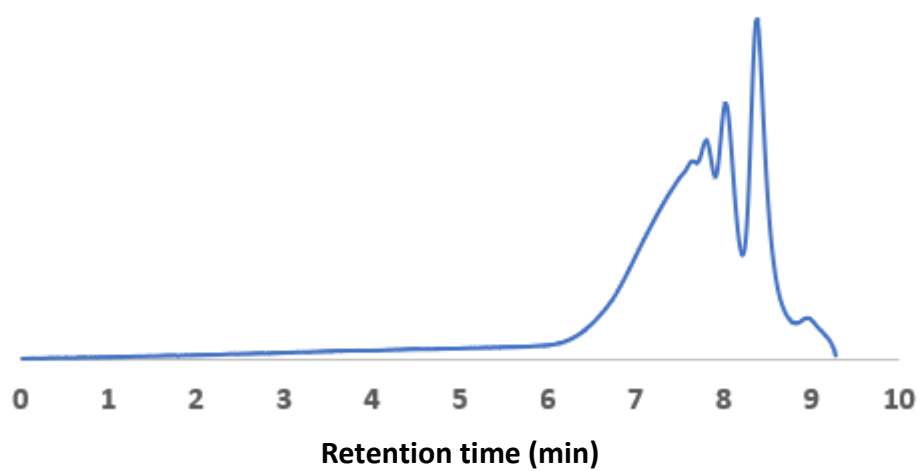

**Figure S9.** GPC trace of poly(EEO-co-PA).

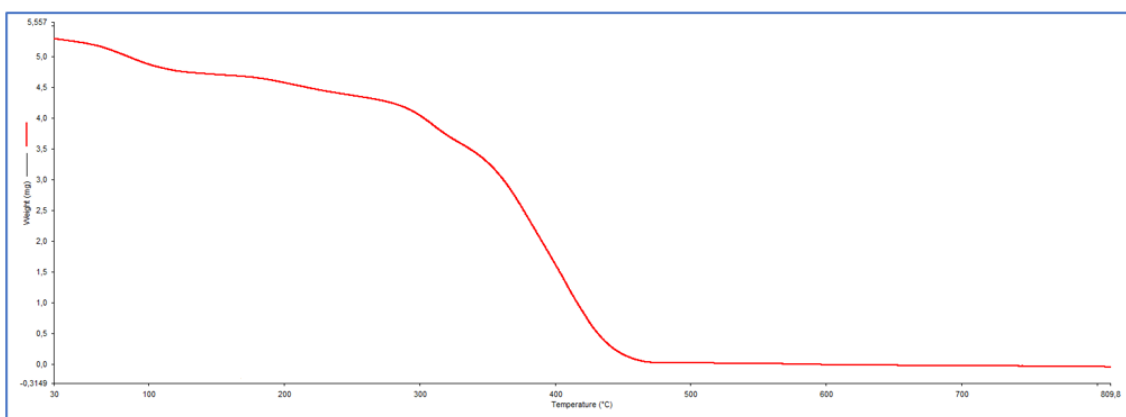

**Figure S10.** TGA analysis of poly(EEO-*co*-PA).

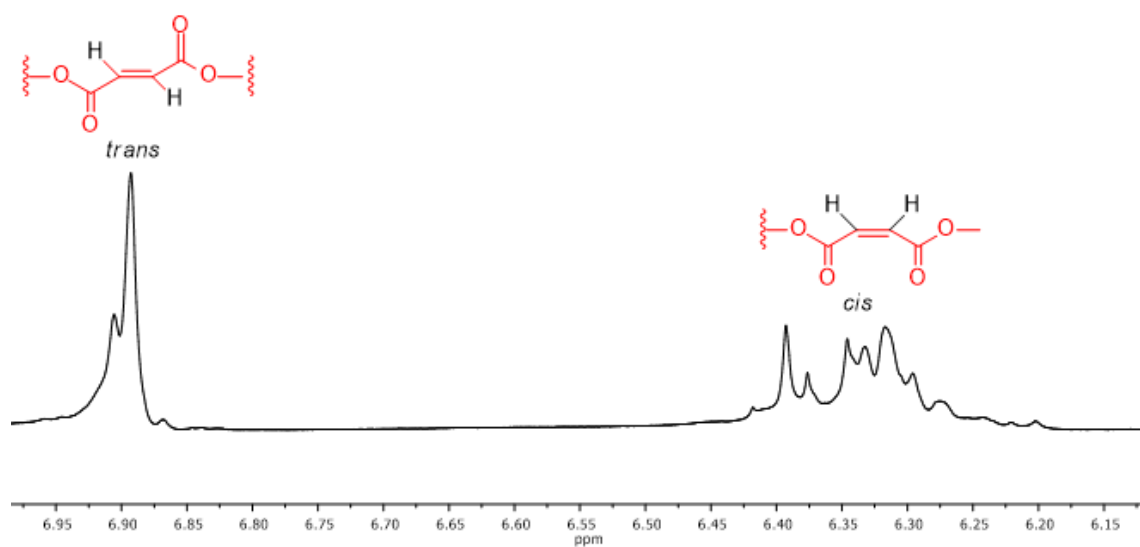

**Figure S11.** <sup>1</sup>H-NMR spectrum of mixture *cis/trans* poly(EEO-*co*-MA); Table 2, entry 1



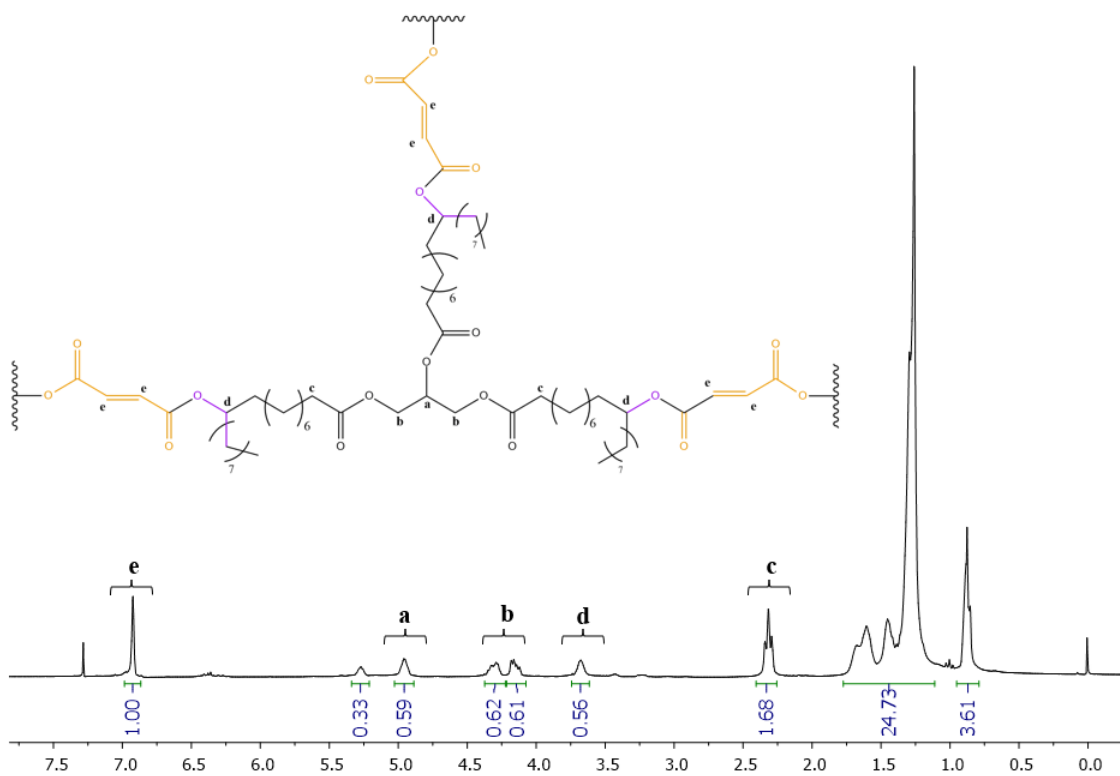

**Figure S12.** <sup>1</sup>H-NMR spectrum of *trans* poly(EOO-co-MA) in CDCl<sub>3</sub>.

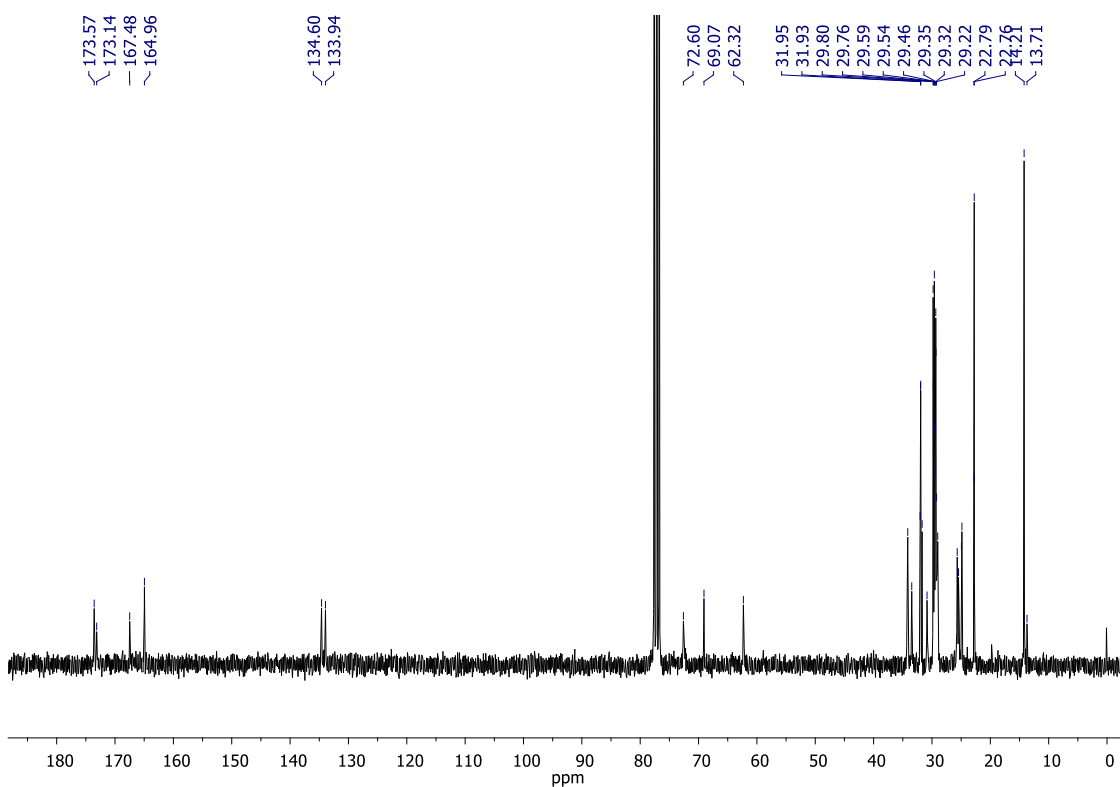

**Figure S13.** <sup>13</sup>C{<sup>1</sup>H}-NMR spectrum of *trans* poly(EOO-co-MA) in CDCl<sub>3</sub>.

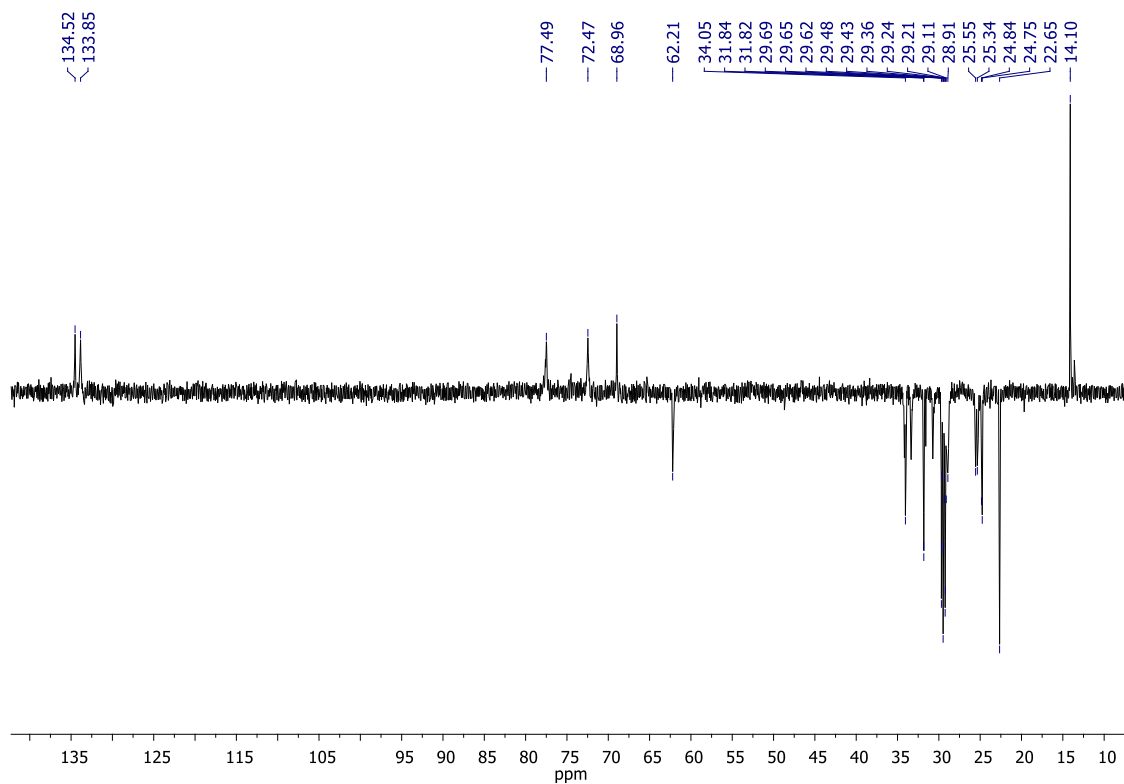

**Figure S14.** DEPT-NMR spectrum of *trans* poly(EOO-*co*-MA) in CDCl<sub>3</sub>.

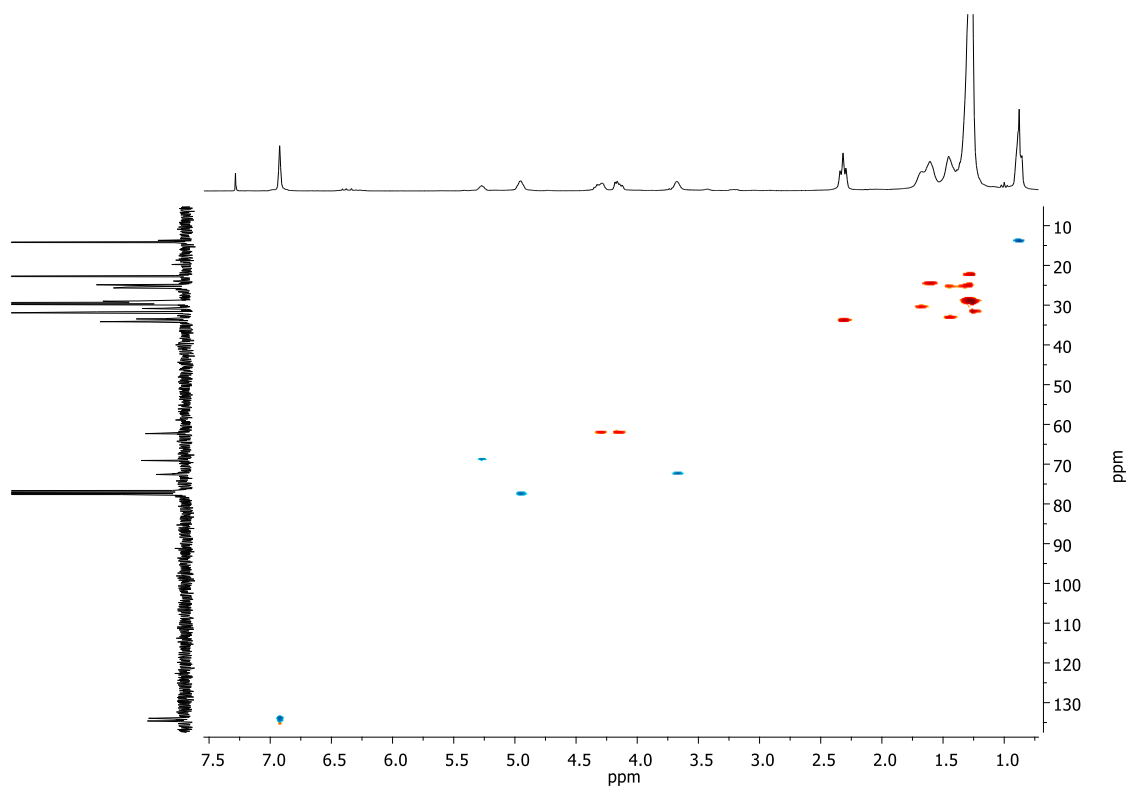

**Figure S15.** g-HSQC NMR spectrum of poly(EOO-*co*-SA) in CDCl<sub>3</sub>.

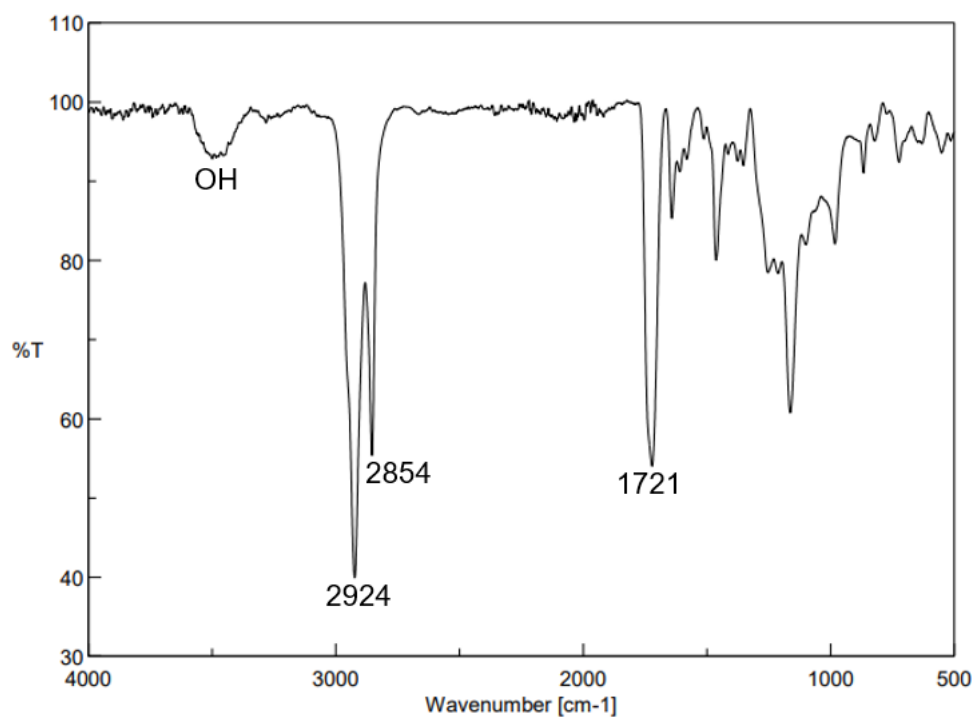

**Figure S16.** FT-IR spectrum of *trans* poly(EEO-*co*-MA) in CDCl<sub>3</sub>.

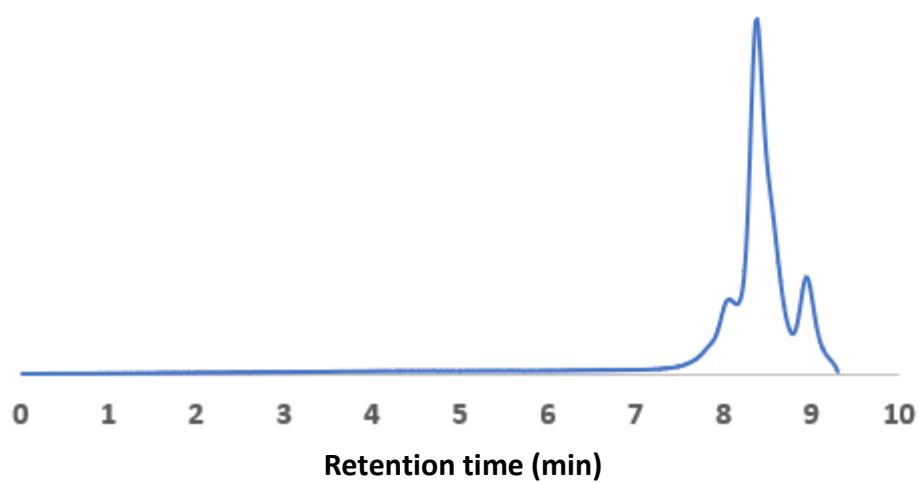

**Figure S17.** GPC trace of *trans* poly(EEO-*co*-MA).

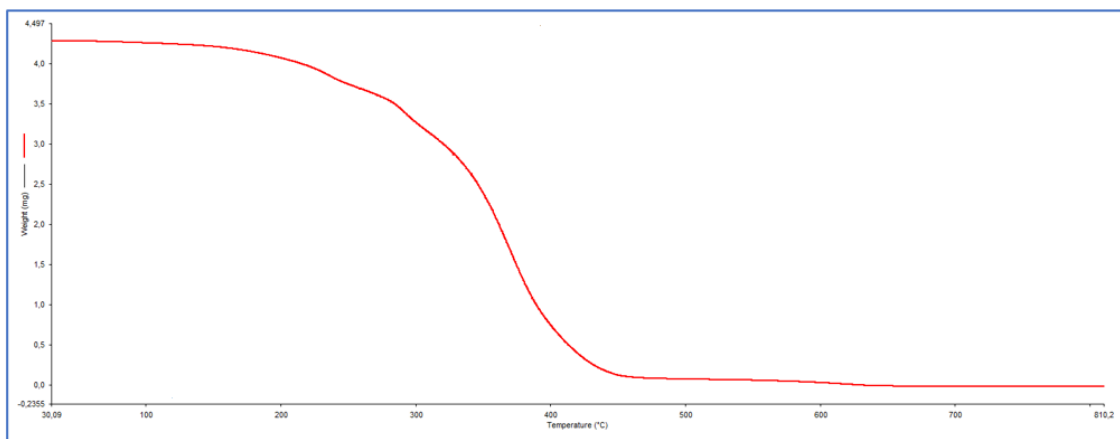

**Figure S18.** TGA analysis of *trans* poly(EOO-*co*-MA).

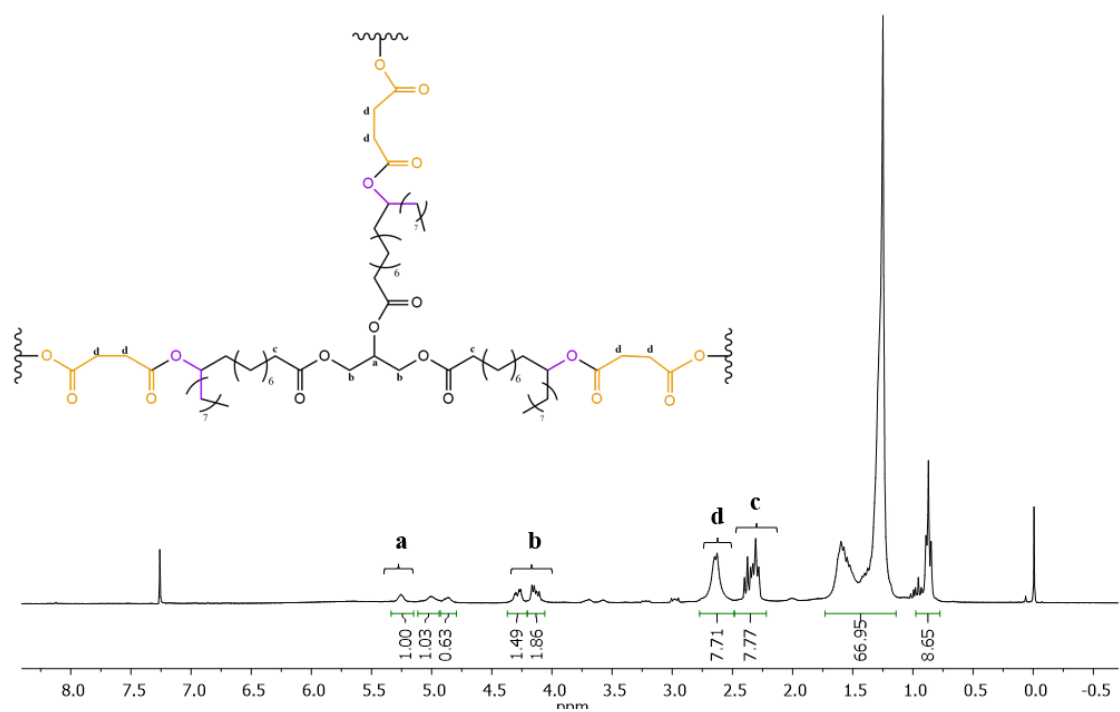

**Figure S19.** <sup>1</sup>H-NMR spectrum of poly(EOO-*co*-SA) in CDCl<sub>3</sub>.

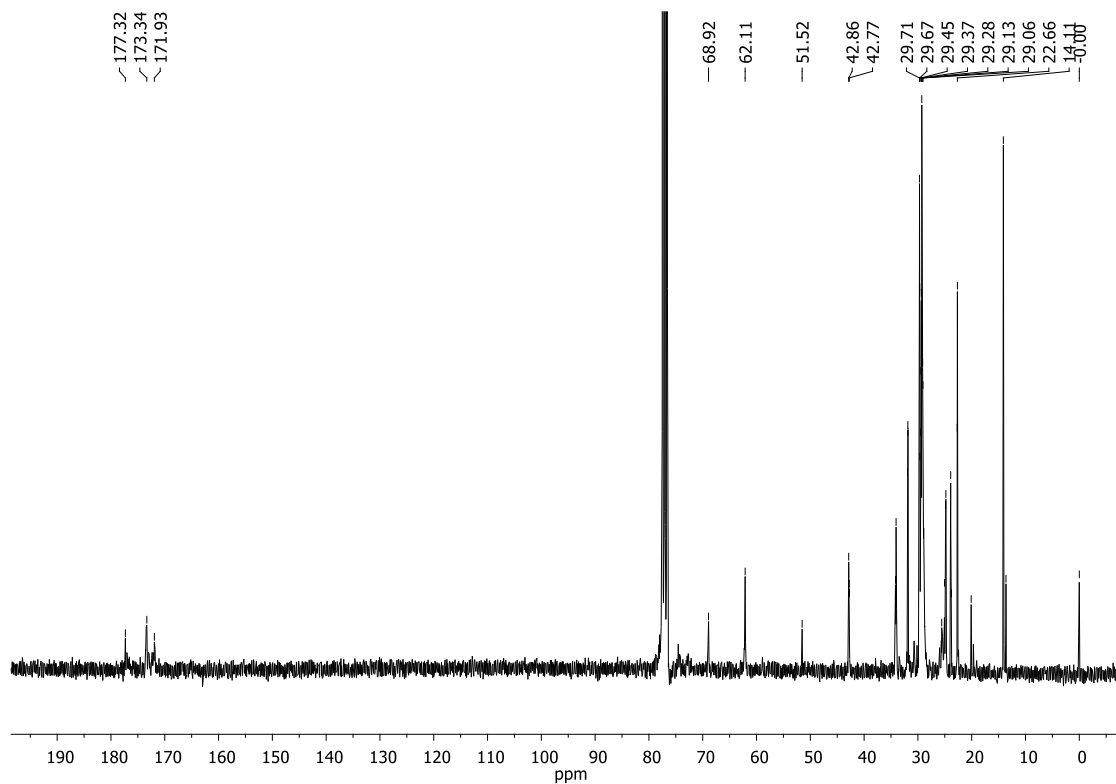

**Figure S20.**  $^{13}\text{C}\{^1\text{H}\}$ -NMR spectrum of poly(EOO-*co*-SA) in  $\text{CDCl}_3$ .

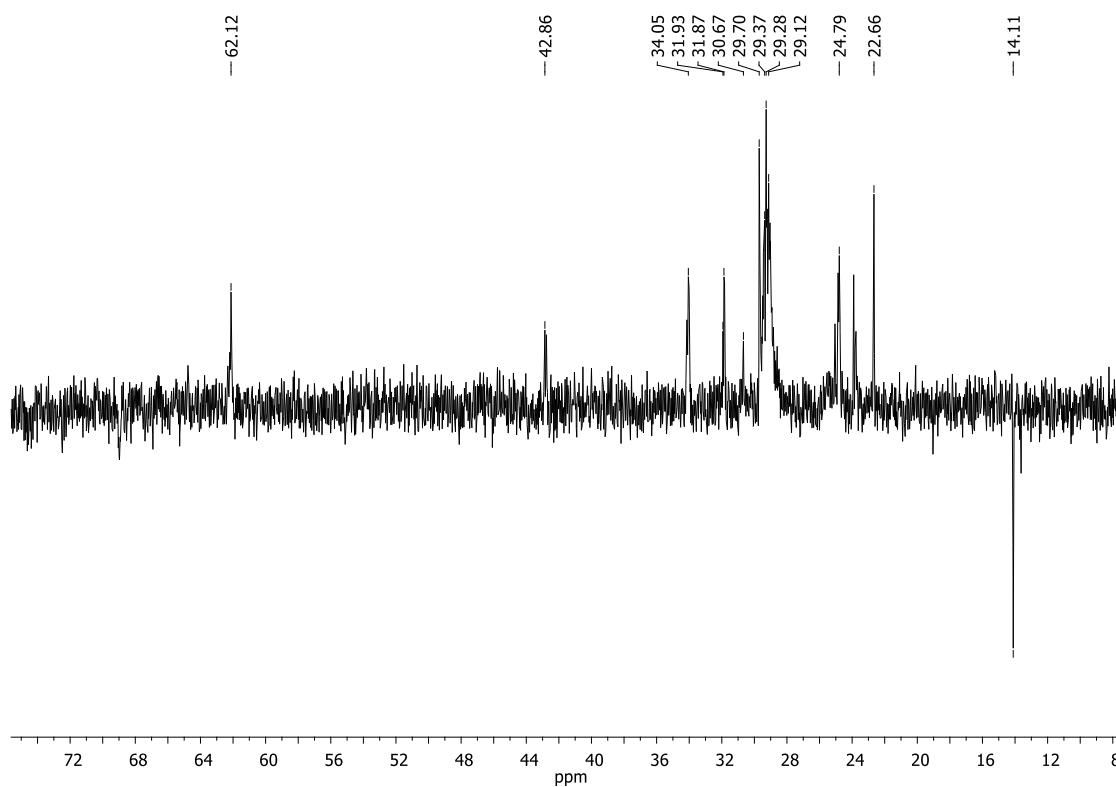

**Figure S21.** DEPT-NMR spectrum of poly(EOO-*co*-SA) in  $\text{CDCl}_3$ .

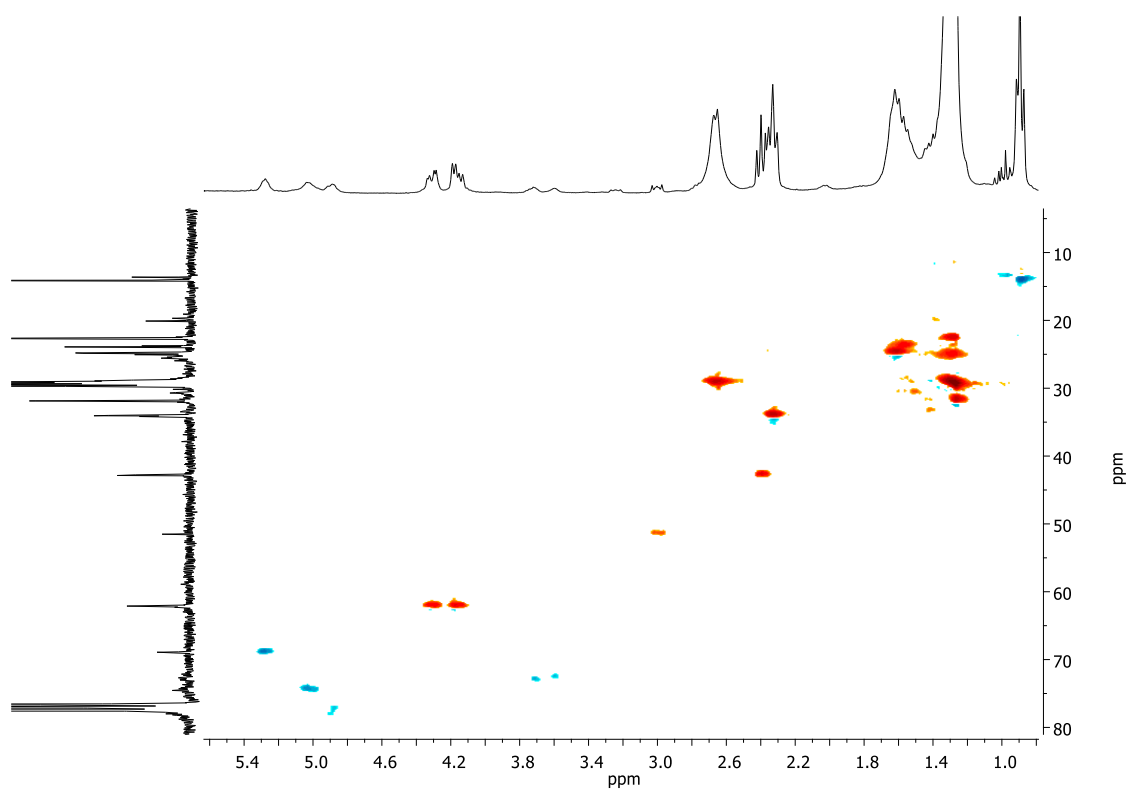

**Figure S22.** g-HSQC NMR spectrum of poly(EEO-*co*-SA) in CDCl<sub>3</sub>.

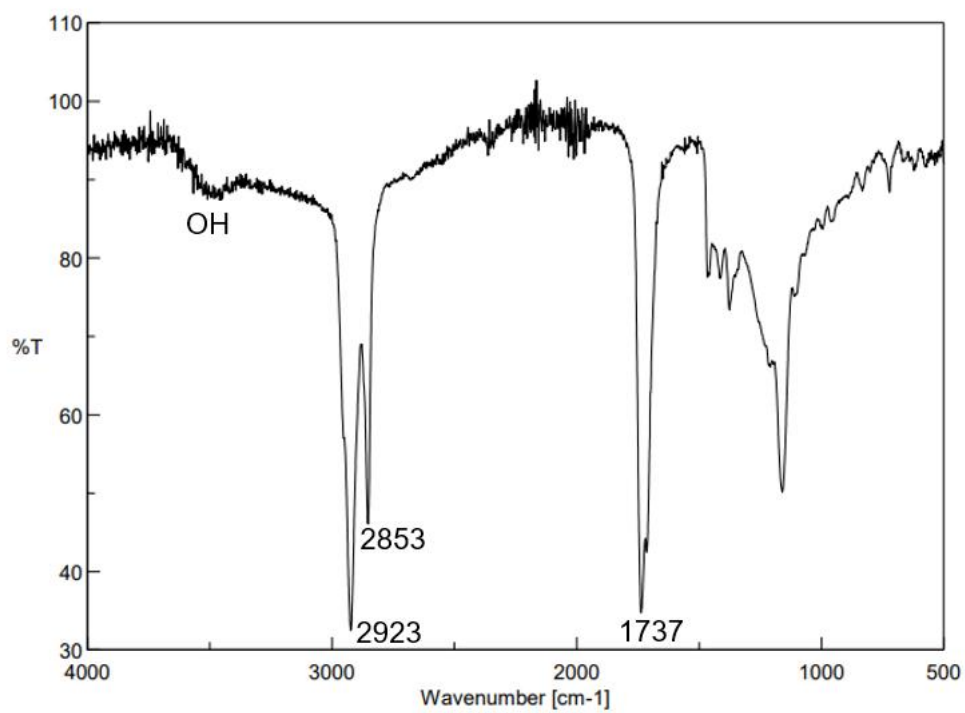

**Figure S23.** FT-IR spectrum of poly(EEO-*co*-SA) in CDCl<sub>3</sub>.

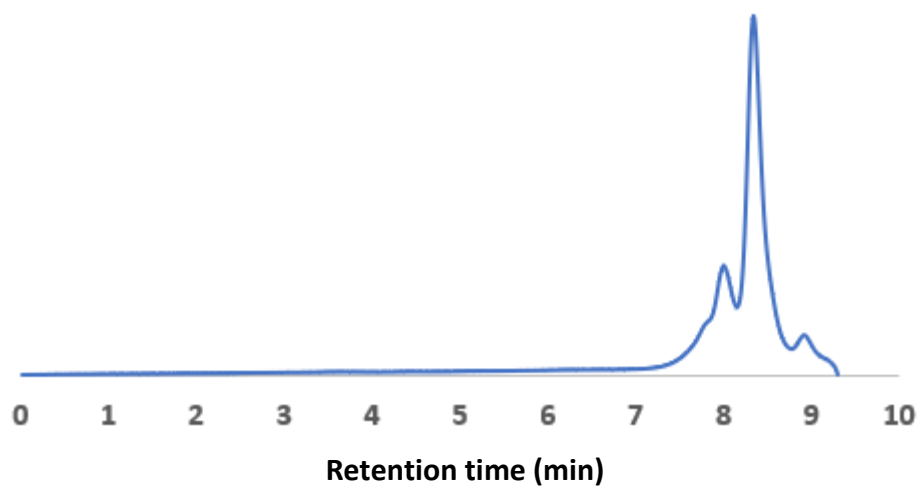

**Figure S24.** GPC trace of poly(EEO-*co*-SA).

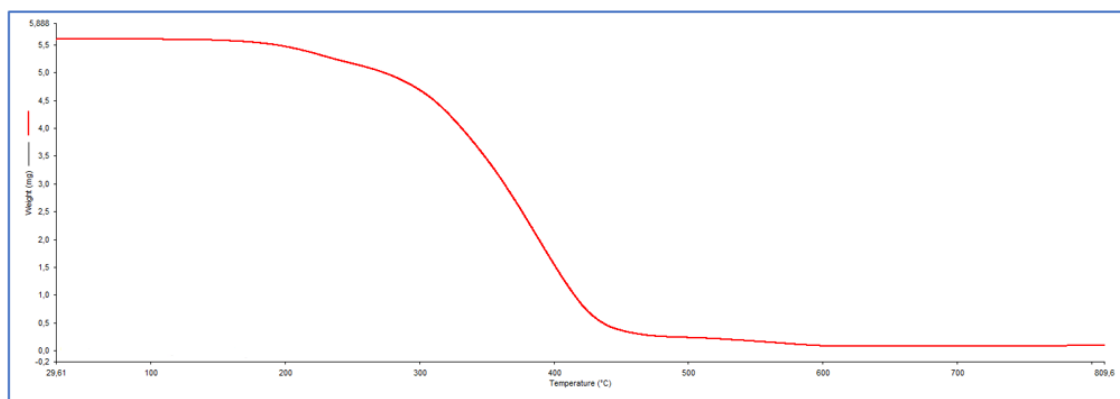

**Figure S25.** TGA analysis of poly(EEO-*co*-SA).

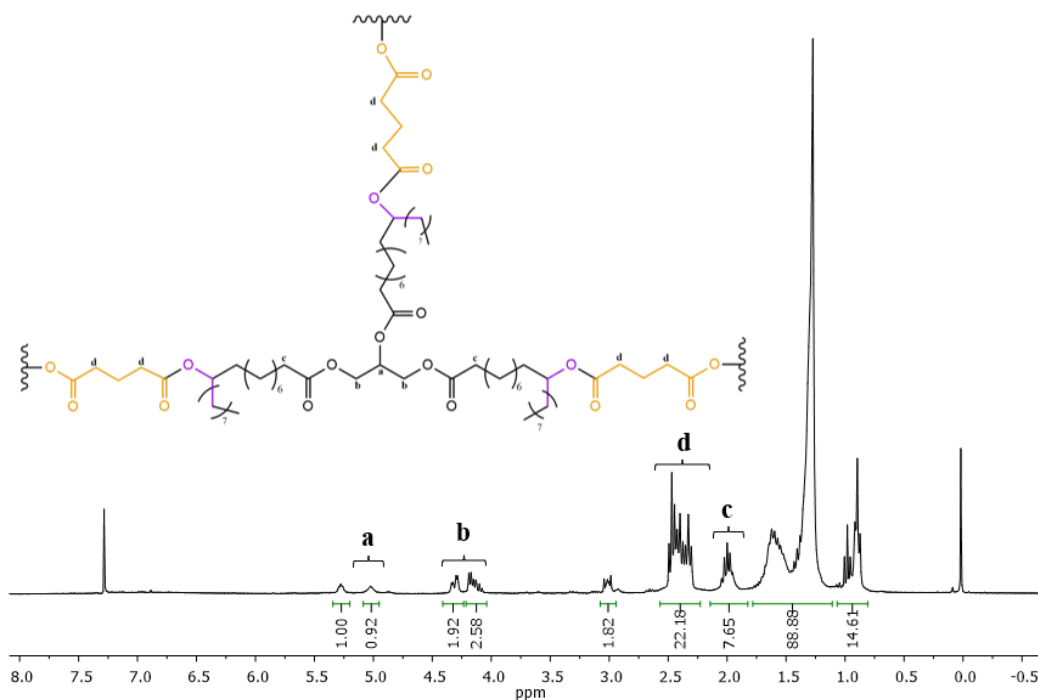

**Figure S26.**  $^1\text{H}$ -NMR spectrum of poly(EEO-*co*-GA) in  $\text{CDCl}_3$ .

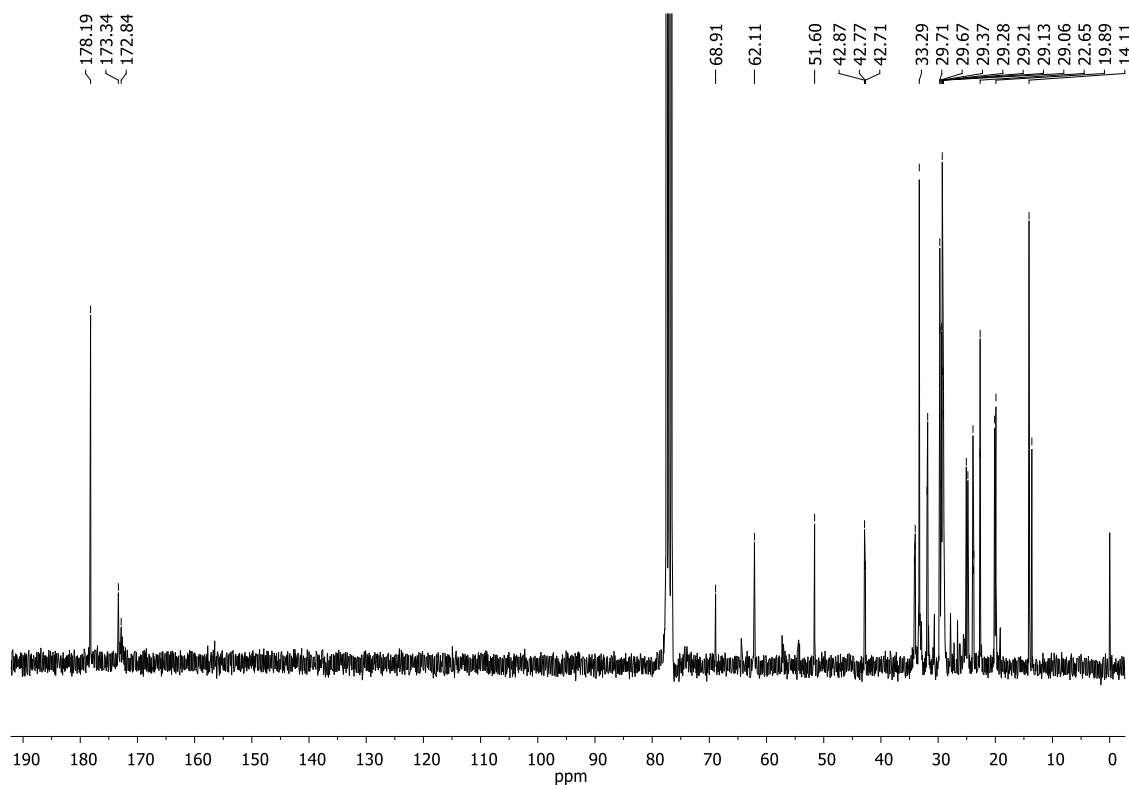

**Figure S27.**  $^{13}\text{C}\{^1\text{H}\}$ -NMR spectrum of poly(EEO-*co*-GA) in  $\text{CDCl}_3$ .



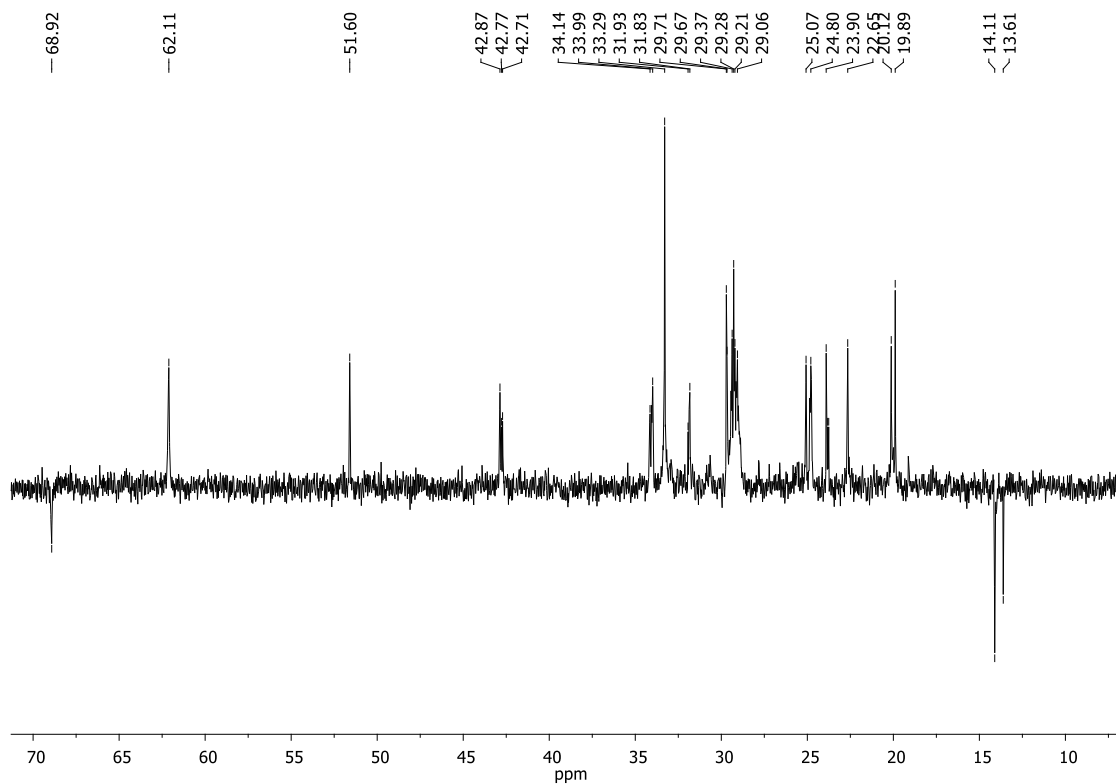

**Figure S28.** DEPT-NMR spectrum of poly(EOO-*co*-GA) in CDCl<sub>3</sub>.

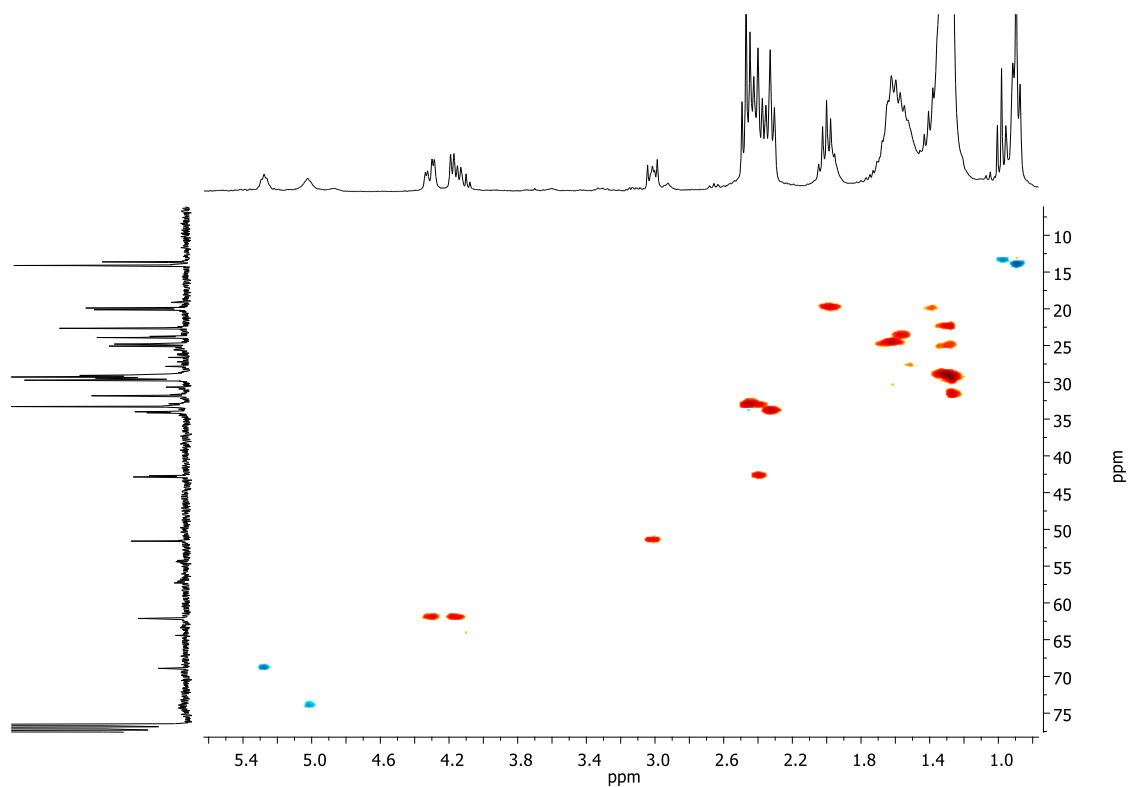

**Figure S29.** g-HSQC-NMR spectrum of poly(EOO-*co*-GA) in CDCl<sub>3</sub>.

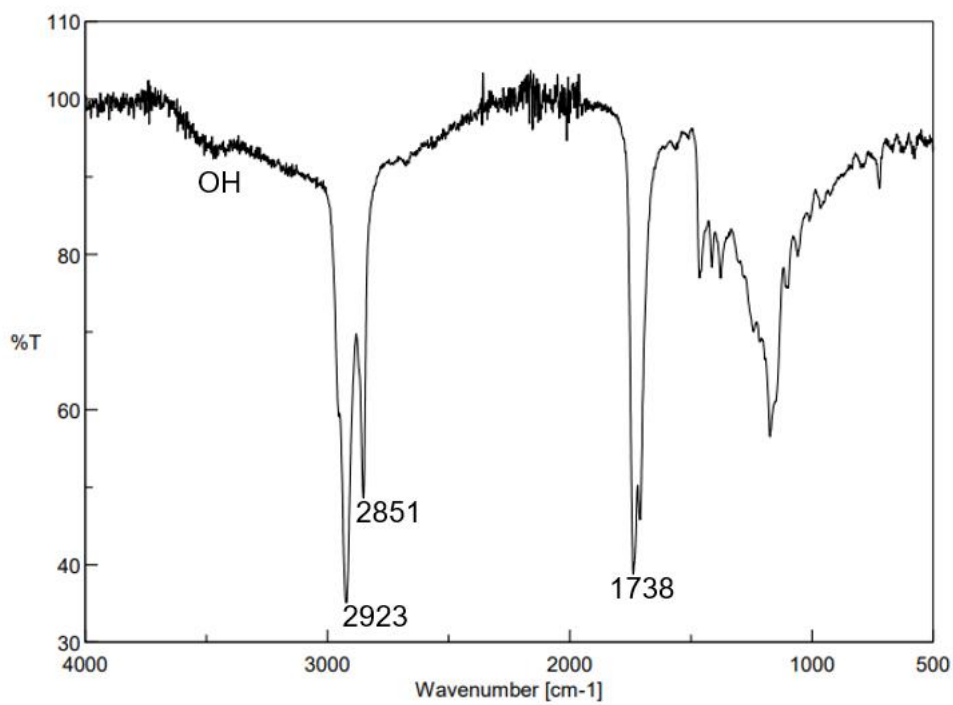

**Figure S30.** FT-IR spectrum of poly(EOO-*co*-GA) in CDCl<sub>3</sub>.

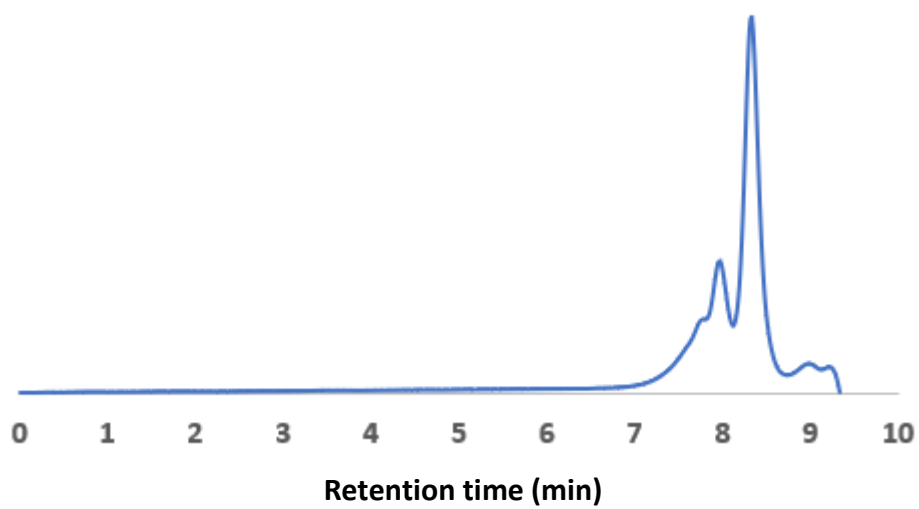

**Figure S31.** GPC trace of poly(EOO-*co*-GA).

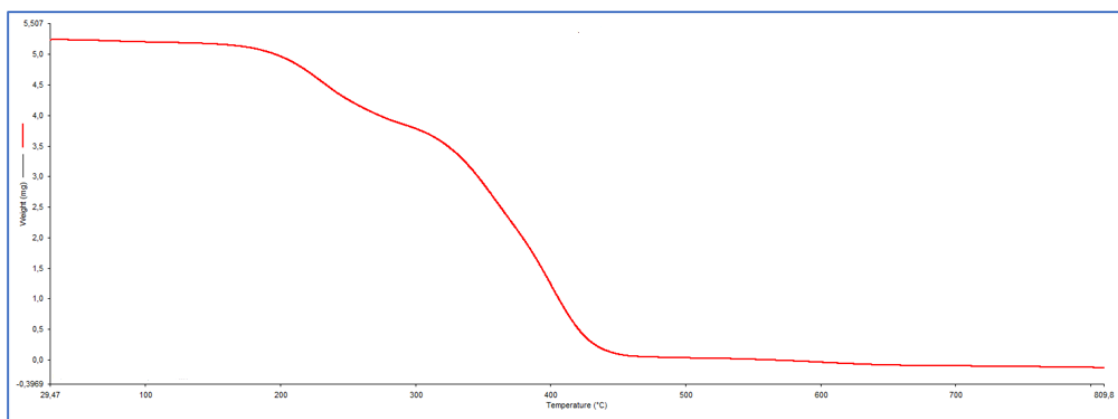

**Figure S32.** TGA analysis of poly(EEO-co-GA).

### Density functional theory (DFT) calculations

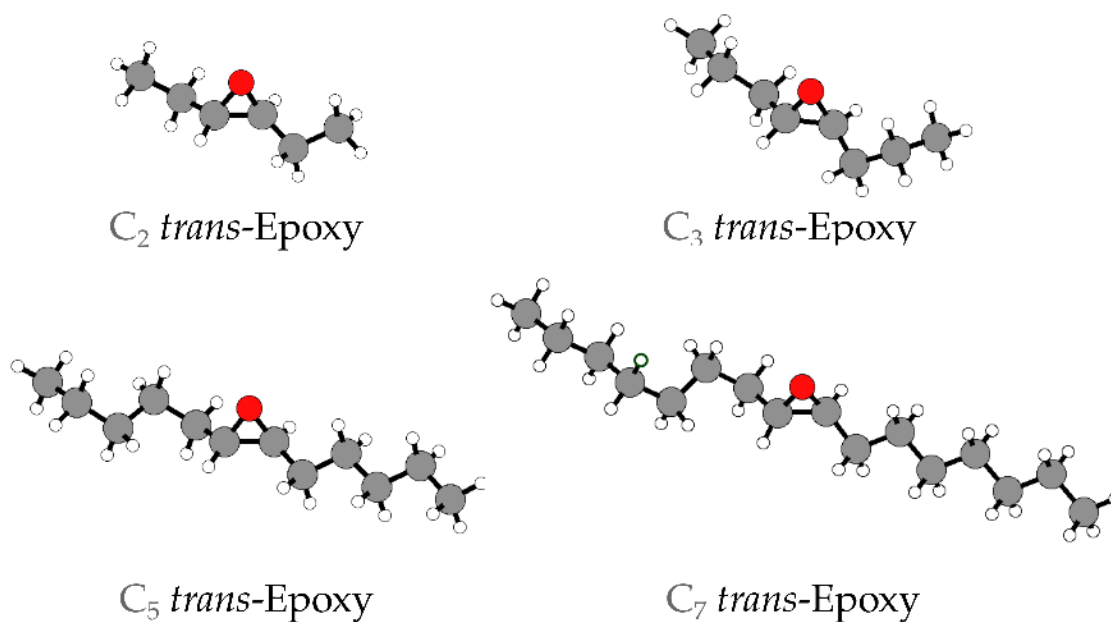

**Figure S33.** Final optimized geometries for a set of epoxide models containing different amounts of carbon units as side-chain. The optimization was carried out at B3LYP def2-TZVP level including the effect of the solvent (toluene) through the implicit solvent model.

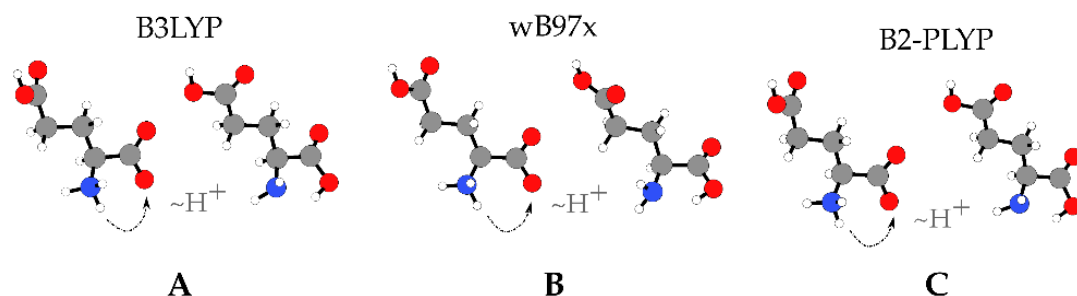

**Figure S34.** Initial and final structures of L-Glu molecule optimized with different DFT xc-functionals. All these optimizations predict a H transfer event from the ammonium to the carboxylate group. These simulations were performed considering toluene as solvent and including dispersion correction through D4 Grimme model.

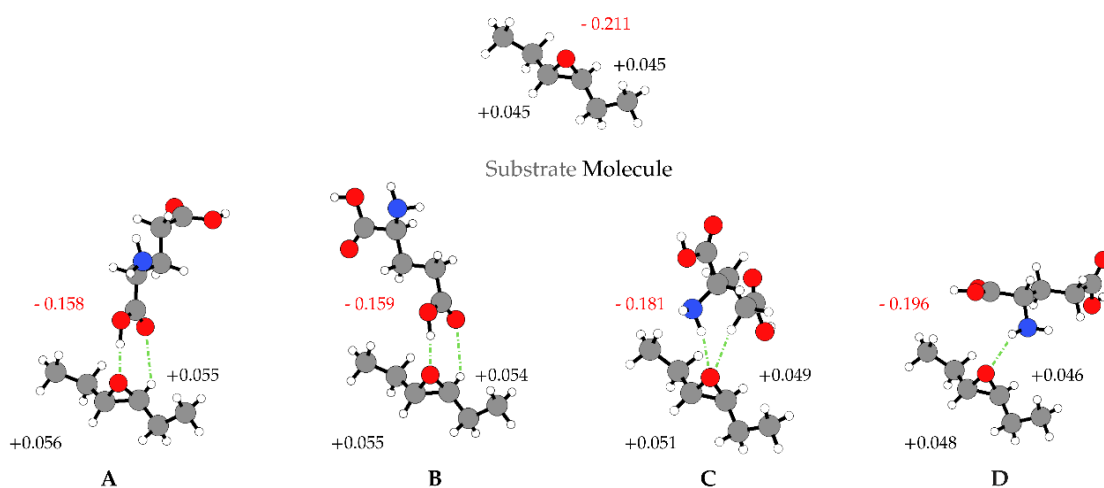

**Figure S35.** Optimized geometries for a set of molecular complexes identified when a single epoxide interacts with different linking point available on L-Glu molecule in vacuum.

**Table S2.** *Trans-cis* relative energies obtained for a set of epoxides with different side-chain sizes computed at DFT and SCS-MP2 level of theory. The obtained energies are reported in kcal mol<sup>-1</sup>.

| Side-chain size | B3LYP def2-TZVP | SCS-MP2 cc-pVTZ |
|-----------------|-----------------|-----------------|
| 2               | - 1.49          | - 1.42          |
| 3               | - 1.58          | - 1.47          |
| 5               | - 0.64          | - 0.77          |
| 7               | - 0.68          | - 0.89          |

**Table S3.** Hirshfeld atomic charge analysis for a set of epoxide model with different side-chain size computed at B3LYP def2-TZVP level in vacuum.

| <b>Side-chain size</b> | <b>Oxygen atom</b> | <b>Carbon 1 atom</b> | <b>Carbon 2 atom</b> |
|------------------------|--------------------|----------------------|----------------------|
| <b>2</b>               | <b>- 0.211</b>     | <b>+ 0.045</b>       | <b>+ 0.045</b>       |
| 3                      | - 0.211            | + 0.044              | + 0.045              |
| 5                      | -0.211             | + 0.044              | + 0.045              |
| 7                      | - 0.211            | + 0.044              | + 0.045              |

**Table S4.** Relative energies obtained for a set of molecular complexes identified at DFT level and recalculated at SCS-MP2 level in vacuum. The obtained energies are reported in kcal mol<sup>-1</sup>.

| <b>Relative energy respect to Structure A</b> | <b>B3LYP def2-TZVP</b> | <b>SCS-MP2 cc-pVTZ</b> |
|-----------------------------------------------|------------------------|------------------------|
| D vs A                                        | 7.38                   | 6.15                   |
| C vs A                                        | 4.78                   | 3.77                   |
| B vs A                                        | 0.55                   | 0.41                   |
| A vs A                                        | 0.00                   | 0.00                   |
